# Supplementary material for: Fabrication of small organic luminogens honeycomb-structured films with aggregation-induced emission features
Source: Royal Society of Chemistry journal article supplement (doi:10.1039/c2jm32730a), 2012-01-01
Supplement: c2jm32730a.pdf [file c2jm32730a.pdf]

## Supporting Information

### Fabrication of Small Organic Luminogens Honeycomb-Structured Films with Aggregation-Induced Emission Features

Liping Heng,<sup>†a</sup> Wei Qin,<sup>†b</sup> Sijie Chen,<sup>b</sup> Rongrong Hu,<sup>b</sup> Jie Li,<sup>b</sup> Na Zhao,<sup>b</sup> Shutao Wang,<sup>a</sup> Ben Zhong Tang,<sup>\*b</sup> Lei Jiang<sup>\*a</sup>

<sup>†</sup> These two authors contributed equally to this article.

<sup>a</sup> *Beijing National Laboratory for Molecular Sciences (BNLMS), Key Laboratory of Organic Solids, Institute of Chemistry, Chinese Academy of Sciences, Beijing 100190 (P. R. China)*

*Fax: (+86) 10-82627566 Email: jianglei@iccas.ac.cn*

<sup>b</sup> *Department of Chemistry, State Key Laboratory of Molecular Neuroscience, Institute of Molecular Functional Materials, The Hong Kong University of Science & Technology, Clear Water Bay, Kowloon, Hong Kong, China*

*E-mail: tangbenz@ust.hk*

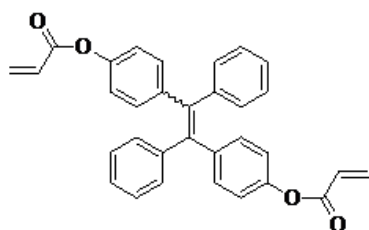

**TPE-4**

**Figure S1** Molecular structure

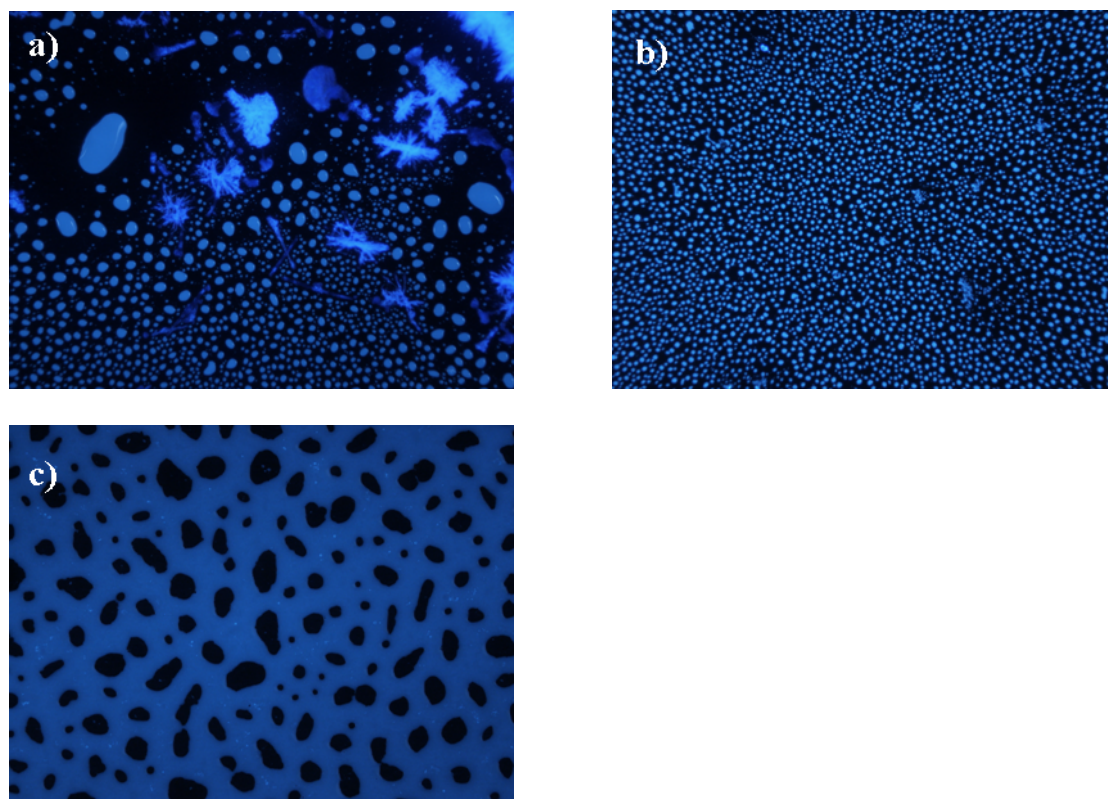

**Figure S2** Fluorescence images of the films prepared by the CHCl<sub>3</sub>, THF and DCE solution of the small molecule TPE-4, respectively
